# Supplementary material for: GENAVOS: A New Tool for Modelling and Analyzing Cancer Gene Regulatory Networks Using Delayed Nonlinear Variable Order Fractional System
Source: Preprints.org preprint supplement (doi:10.20944/preprints202011.0199.v1), 2020-11-04
Supplement: Supplementary file 1 [file supplementary]

Archive with 77 entries (74 files):
- GENAVOS beta version/
- GENAVOS beta version/app1.mlapp
- GENAVOS beta version/app2.mlapp
- GENAVOS beta version/app3.mlapp
- GENAVOS beta version/AssimilateColonies.m
- GENAVOS beta version/bifa.m
- GENAVOS beta version/bifp53.m
- GENAVOS beta version/CalculateTotalCosts.m
- GENAVOS beta version/chaostest.m
- GENAVOS beta version/Content.txt
- GENAVOS beta version/Data/
- GENAVOS beta version/Data/graph.mat
- GENAVOS beta version/Data/hela cellcycle2.mat
- GENAVOS beta version/Data/helacellcycle.csv
- GENAVOS beta version/Data/helap53.csv
- GENAVOS beta version/Data/helap53shifted.csv
- GENAVOS beta version/Data/normal cell net full.csv
- GENAVOS beta version/Data/normal cellcycle.mat
- GENAVOS beta version/Data/normalcellp53.csv
- GENAVOS beta version/Data/normalcellp53m.csv
- GENAVOS beta version/Data/pre53hela.m
- GENAVOS beta version/Data/pre53nor.m
- GENAVOS beta version/Data/preCChela.m
- GENAVOS beta version/Data/preCCnor.m
- GENAVOS beta version/evalf.m
- GENAVOS beta version/ExchangeWithBestColony.m
- GENAVOS beta version/fixpoi.m
- GENAVOS beta version/genavos.png
- GENAVOS beta version/hilln.m
- GENAVOS beta version/hillp.m
- GENAVOS beta version/ica.m
- GENAVOS beta version/ImperialisticCompetition.m
- GENAVOS beta version/InitializeImperials.m
- GENAVOS beta version/license mat2clip.txt
- GENAVOS beta version/license-chaos test.txt
- GENAVOS beta version/logsign.m
- GENAVOS beta version/logsigp.m
- GENAVOS beta version/mat2clip.m
- GENAVOS beta version/memo.m
- GENAVOS beta version/memo1.m
- GENAVOS beta version/MEPE53.m
- GENAVOS beta version/MEQGRNH.m
- GENAVOS beta version/MEQGRNL.m
- GENAVOS beta version/metadata.m
- GENAVOS beta version/mkfd.m
- GENAVOS beta version/mkfrbf1.m
- GENAVOS beta version/mkorcos.m
- GENAVOS beta version/parchen.m
- GENAVOS beta version/pgp.m
- GENAVOS beta version/ploterror.m
- GENAVOS beta version/postresult.m
- GENAVOS beta version/pq.m
- GENAVOS beta version/Rastrigin.m
- GENAVOS beta version/Results/
- GENAVOS beta version/Results/cellcycle hela Lconst.mat
- GENAVOS beta version/Results/cellcycle hela-2.mat
- GENAVOS beta version/Results/cellcycle hela-D=0.3.mat
- GENAVOS beta version/Results/cellcycle normal Lconst.mat
- GENAVOS beta version/Results/cellcycle normal-D=0.2.mat
- GENAVOS beta version/Results/cellcycle normal.mat
- GENAVOS beta version/Results/or-cellcycle hela Lconst.mat
- GENAVOS beta version/Results/or-cellcycle hela-D=0.3.mat
- GENAVOS beta version/Results/or-cellcycle normal Lconst.mat
- GENAVOS beta version/Results/or-cellcycle normal-D=0.2.mat
- GENAVOS beta version/Results/or-cellcycle-hela2.mat
- GENAVOS beta version/Results/or-cellcycle-normal.mat
- GENAVOS beta version/RevolveColonies.m
- GENAVOS beta version/RouletteWheelSelection.m
- GENAVOS beta version/searchK.m
- GENAVOS beta version/SEQGRN.m
- GENAVOS beta version/SEQGRN1.m
- GENAVOS beta version/Sgp.m
- GENAVOS beta version/ShareSettings.m
- GENAVOS beta version/ss1.m
- GENAVOS beta version/ssd1.m
- Supplementary Results .docx
- Genavos Help.docx
