# Supplementary material for: GENAVOS: A New Tool for Modelling and Analyzing Cancer Gene Regulatory Networks Using Delayed Nonlinear Variable Order Fractional System
Source: Preprints.org preprint supplement (doi:10.20944/preprints202011.0199.v1), 2020-11-04
Supplement: Supplementary file 1 [file supplementary › GENAVOS beta version/Content.txt]

Contents
app1.mlapp:    main application file of GENAVOS
app2.mlapp:    primery result page
app3.mlapp:    secondary result page

bifa:          bifurcation plot
bifp53:        bifurcation analysis
chaostest:     chaos test for time series , Copyright (c) 17 March 2009 by Ahmed BenSaïda           %
%                 Department of Finance, IHEC Sousse - Tunisia           %
%                       Email: ahmedbensaida@yahoo.com                   %
%                   $ Revision 5.1 $ Date: 2 April 2016 $  
evalf:         system evaluation after parameters changing
hilln          inhibition hill type function
hillp          activation hill type function
logsign        inhibition logsigmoid function 
logsigp        activation logsigmoid function
mat2clip       Copies matrix to system clipboard, Copyright 2009 The MathWorks, Inc.
% Inspired by NUM2CLIP by Grigor Browning (File ID: 8472) Matlab FEX.
memmo          calculate memmory term of fractional order diff eq numerical solution in Grünwald–Letnikov method
memmo1         calculate memmory term of variable order fractional diff eq numerical solution in Grünwald–Letnikov method
MEPE53         main function for caculation error(SAE), variable orderand response of system
MEQGRNH        main function for neumerical solution of system with Hill function
MEQGRNL        main function for neumerical solution of system with Logsigmoid function
metadata       load and extract comperative data
mkfd           min-max normalization of input fuction
mkfrbf1        make RBF neural network as variable order function
mkorcos        make cosine fourier series as variable order function
parchen        chenge parameters
ploterror      plot cost function of ICA
postresult     visualize figures and caculation of primery results  
pq             calculate p-q in 0-1 chaos test
searchK        calculate 0-1 test result
SEQGRN         calculate VOF diff eq from network topology at every simulation step for MEQGRNH
SEQGRN1        calculate VOF diff eq from network topology at every simulation step for MEQGRNH

 
