# Supplementary material for: GENAVOS: A New Tool for Modelling and Analyzing Cancer Gene Regulatory Networks Using Delayed Nonlinear Variable Order Fractional System
Source: Preprints.org preprint supplement (doi:10.20944/preprints202011.0199.v1), 2020-11-04
Supplement: Supplementary file 1 [file supplementary › GENAVOS beta version/Data/helacellcycle.csv]

MYC	-0.443685	-0.63893	-0.065388	0.158401	0.050685	-0.149298	0.710332	0.68893	-0.634875	-0.055882	-0.21933	0.081353		0.065941	-0.180956	-0.334259	-0.12375	-0.160576	0.055782	-0.079323	-0.036037	-0.117241	-0.077017	0.171213	-0.374266	0.14578	-0.219893	-0.027793	0.067265	-0.004443	0.095482	0.185257	0.019638	0.307966	0.462723	0.135488	0.21398	0.210908	0.534179		-0.193626	-0.144105	-0.128242	-0.570799	-0.300995	-0.104129	-0.177074	-0.198321	-0.098648
MYC	-0.14418	-0.241606	-0.059764	0.314711	0.4379	-0.007303	0.192552	0.179196	-0.219377	-0.107538	-0.855929	-0.044872		0.13522	-0.080058	0.232931	0.009173	0.068481	0.166583	-0.322408	-0.147077	0.148424	0.351448	0.090238	-0.438348	-0.210268	-0.289379	-0.511905	-0.051867	-0.035298	0.225468	0.234933	0.036235	0.224087	0.251092	0.068635	0.51135	-0.079613	-0.36661		-0.186164	-0.197873	-0.114516	-0.332619	0.021964	-0.151337	0.001534	-0.203836	-0.225325
MYC	-0.16637	-0.637316	-0.335886	0.166143	0.019385	-0.041415	0.463898	0.383852	-0.054752	0.667074	-0.554895	-0.331381		-0.254591	-0.455135	-0.447114	0.120863	-0.188734	0.205425	0.335932	-0.029311	0.14165	-0.210064	0.393047	0.045014	0.598982	0.478857	-0.289719	-0.354035	0.003663	-0.329042	-0.108346	-0.442504	0.219855	-0.076728	-0.414851	0.246488	-0.106791	-0.014381		0.000339	-0.056447	-0.001013	-0.375185	-0.233864	-0.207586	-0.399208	-0.168074	0.01608
E2F1	0.047132	-0.265392	-0.086534	0.203058	-1.190442	-0.349435	-0.301133	0.496353	0.94506	0.849496	0.71173	-0.412943		0.582562	0.893208	0.303934	0.691331	-0.179357	0.044009	-0.727375	-0.511632	-0.157493	-0.110946	0.130916	0.013533	0.651016	0.724384	0.354786	-0.222728	-0.197427	-0.84451	-0.876247	-0.893436	-0.13508	0.503726	-0.027063	-0.808289	0.052298	-0.110955		0.448647	0.499191	0.352952	0.080114	0.203187	-0.225586	-0.386873	-0.757563	-0.846596
E2F1	0.504834	0.217654	-0.1397	0.106578	-1.015607	-0.321146	-0.318692	0.73692	0.239805	0.535361	0.282259	-0.540544		0.753489	0.740314	0.252051	0.690705	-0.048768	0.000229	-1.050275	-0.185916	-0.388989	0.271768	-0.489813	0.068341	0.599425	0.93218	0.23124	-0.169665	0.151262	-0.719625	-0.425034	-1.115072	-0.127446	0.403915	0.211239	-0.596408	0.347996	-0.418967		0.23369	0.231208	0.372665	0.344179	0.178941	-0.092074	-0.16967	-0.215182	-0.468693
RB1	0.067742	0.211928	0.067049	0.160428	-0.24127	-0.121248	0.000454	-0.124277	-0.243934	-0.123249	0.362353	0.209973		0.49952	0.259867	-0.528864	0.223245	-0.66332	0.081002	-0.034438	-0.181899	-0.111367	0.105021	-0.175014	0.170968	0.068236	0.035174	0.125218	0.152602	0.07705	-0.203793	0.162025	-0.398827	0.112889	0.284632	0.186796	0.221754	-0.022762	0.135394		0.069709	0.096007	0.105599	0.016662	-0.085409	-0.025133	-0.160604	-0.114558	-0.150292
CDK4	0.140234	-0.14204	-0.357875	0.358964	-0.332561	0.026072	0.337912	0.407786	0.023455	0.080521	-0.509687	-0.318843		0.3986	0.286949	0.353226	0.214347	-0.072211	0.143112	-0.72032	-0.042803	0.088719	-0.252875	-0.274907	0.295049	-0.001656	-0.068711	0.207258	-0.008274	0.115096	-0.237753	-0.009931	-0.192736	-0.059069	0.099694	0.409826	0.146821	0.094255	-0.165547		0.252415	0.077693	-0.094716	0.064274	-0.030474	-0.384686	-0.150796	-0.162286	-0.680391
CDC25A	0.287594	0.565393	0.366853	-0.493104	0.213234	-0.572411	-0.118661	0.159418	-0.231419	-0.121016	-0.403723	-0.021552		0.291102	-0.462717	-0.095031	-0.138751	-0.300364	-0.228271	-0.496265	-0.197825	-1.191604	-0.308078	-0.028301	-0.338068	0.88974	0.969342	0.205185	0.795167	0.008843	-0.124924	-0.364869	0.178991	0.484904	0.333855	-0.242829	-0.349041	0.259748	0.23737		0.269788	0.064754	0.321386	0.096011	0.111811	0.285673	-0.104429	-0.076248	0.16827
CDC25A																																									0.109914	0.383637	0.16593	0.062455	0.248484	0.260869	-0.030564	-0.372084	-0.142978
CDK2																																									-0.095146	0.422971	0.452916	0.177358	0.185566	-0.001929	0.072369	-0.256186	-0.352771
CDKN1B	-0.054042	0.337266	0.389422	0.685765	0.607185	-0.133182	-0.024413	-0.170754	-0.913814	-0.697827	0.123429	-0.400552		0.161092	0.077971	0.024514	0.546514	0.465342	0.733301	0.112479	0.078447	-0.313038	0.005896	-1.038793	-0.568708	-0.361799	-0.489222	-0.19408	0.152218	0.477439	0.114017	0.521064	-0.275501	-0.317752	-0.14415	0.323649	0.43489	-0.046279	-0.05575		0.036626	0.003198	-0.006578	0.252762	0.24626	0.083912	0.374411	0.474511	0.479072
CDKN1B																																									0.075147	-0.023929	-0.095217	0.174826	0.077924	-0.010023	0.27377	0.150965	0.375543
[truncated: 67 more columns]
