# Supplementary material for: GENAVOS: A New Tool for Modelling and Analyzing Cancer Gene Regulatory Networks Using Delayed Nonlinear Variable Order Fractional System
Source: Preprints.org preprint supplement (doi:10.20944/preprints202011.0199.v1), 2020-11-04
Supplement: Supplementary file 1 [file supplementary › GENAVOS beta version/Data/helap53.csv]

TP53	0.161097	-0.047933	-0.029917	0.113323	-0.006162	0.231254	0.543016	-0.270733	-0.594638	-0.035603	0.353568	-0.504538		0.447318	0.104887	0.298301	0.580914	0.54769	0.613411	0.184683	0.391555	0.322372	-0.142959	-0.376078	0.145356	-0.237254	-0.41757	-0.408522	-0.63943	-0.178863	-0.278353	-0.284811	-0.361748	-0.332419	-0.327534	-0.568383	-0.109201	-0.255585	-0.085714		0.549893	0.455673	0.458774	0.151609	0.247598	0.023162	0.050473	-0.123494	0.087842
TP53	0.556878	0.563454	0.208761	-0.081095	-0.011294	0.021433	-0.683474	0.052902	0.226878	-0.108502	-0.641129	-0.207178																													0.441942	0.505122	0.407542	0.228989	0.052376	0.07956	0.048145	-0.094677	-0.022577
E2F1	0.047132	-0.265392	-0.086534	0.203058	-1.190442	-0.349435	-0.301133	0.496353	0.94506	0.849496	0.71173	-0.412943		0.582562	0.893208	0.303934	0.691331	-0.179357	0.044009	-0.727375	-0.511632	-0.157493	-0.110946	0.130916	0.013533	0.651016	0.724384	0.354786	-0.222728	-0.197427	-0.84451	-0.876247	-0.893436	-0.13508	0.503726	-0.027063	-0.808289	0.052298	-0.110955		0.448647	0.499191	0.352952	0.080114	0.203187	-0.225586	-0.386873	-0.757563	-0.846596
E2F1	0.504834	0.217654	-0.1397	0.106578	-1.015607	-0.321146	-0.318692	0.73692	0.239805	0.535361	0.282259	-0.540544		0.753489	0.740314	0.252051	0.690705	-0.048768	0.000229	-1.050275	-0.185916	-0.388989	0.271768	-0.489813	0.068341	0.599425	0.93218	0.23124	-0.169665	0.151262	-0.719625	-0.425034	-1.115072	-0.127446	0.403915	0.211239	-0.596408	0.347996	-0.418967		0.23369	0.231208	0.372665	0.344179	0.178941	-0.092074	-0.16967	-0.215182	-0.468693
MDM2																																									0.191536	-0.128516	0.1407	0.060979	0.012866	-0.02928	0.149217	-0.233837	-0.15055
MDM2																																									-0.22116	0.028097	0.489389	0.41152	0.190574	0.283185	0.219216	-0.2115	-0.055837
MDM2 *	0.18862	-0.049708	0.146539	0.260881	0.305795	-0.057763	0.207865	-0.015651	-0.240909	0.025422	-0.087124	-1.041144		0.141252	0.166636	-0.09427	-0.35407	-0.173826	-0.190124	-0.075403	0.15298	-0.065209	0.1601	0.772376	0.879137	0.587431	-0.623172	-0.135558	-0.600947	-0.276924	-0.471255	-0.237147	0.401553	0.107845	-0.166049	-0.23335	0.062924	-0.301708	-0.06309		0.191385	-0.005488	-0.044996	-0.102114	0.007541	0.441935	-0.000606	-0.077406	0.042749
MDM2	0.149434	-0.17495	-0.384388	-0.071384	-0.061634	0.480126	0.389545	0.391972	-0.02441	-0.133672	-0.399697	-0.527451		-0.136583	-0.55978	0.069811	-0.129031	0.274112	0.232238	-0.087752	-0.355627	-0.122562	-0.03855	0.19326	0.426051	0.056662	-0.485881	0.460892	-0.554996	-0.065599	0.124235	0.119517	0.740676	0.473431	-0.037466	-0.15345	0.235099	0.127655	0.0964		0.062706	0.099085	0.455056	0.165967	0.098672	-0.005313	0.086726	-0.412908	-0.18474
CDKN2A	0.295299	-0.400778	-0.424983	-0.011982	-0.303029	0.038497	0.480221	0.213845	0.62829	-0.253546	-0.602853	0.106633		-0.090539	-0.32995	0.170211	0.192342	0.322605	0.086375	0.204927	-0.378893	-0.002046	0.504338	0.028331	0.210349	0.1133	-0.162304	0.19137	-0.124135	-0.238605	-0.100455	-0.031572	-0.410389	-0.057004	-0.190375	-0.047046	-0.18713	-0.005138	-0.143254		-0.020457	-0.064833	-0.053266	0.007704	-0.044722	-0.00969	0.111141	0.057518	-0.128871
[truncated: 67 more columns]
