# Supplementary material for: GENAVOS: A New Tool for Modelling and Analyzing Cancer Gene Regulatory Networks Using Delayed Nonlinear Variable Order Fractional System
Source: Preprints.org preprint supplement (doi:10.20944/preprints202011.0199.v1), 2020-11-04
Supplement: Supplementary file 1 [file supplementary › GENAVOS beta version/Data/helap53shifted.csv]

TP53	7.11748325	7.30568925	7.10159025	7.22524425	6.74196225	6.92114425	6.99428125	7.24163525	7.19538925	7.37467925	7.57238825	7.38080425	7.34769725	7.39155625	7.23928525	7.37202125	7.92492725
E2F1	7.87797267	6.66326067	7.55019867	8.47896367	8.42191067	8.80103567	7.95168267	8.62839667	7.74674467	7.34336867	7.96885567	8.26920967	8.59421667	7.84804767	8.57762567	8.45517867	7.47363567
MDM2	5.58552428	6.08371228	5.83102828	5.41525228	5.28037528	5.17246528	5.00756628	5.50461628	5.68976328	5.71478728	6.46622728	5.39499628	5.69923128	5.95735628	5.95859928	5.67180728	6.18526728
ARF	8.24573015	7.50585215	7.80020015	8.26645115	7.96749215	8.01054415	7.70070715	8.56657515	8.38944815	8.34746315	8.32723415	8.43405415	8.12110615	8.01890315	8.09285215	8.06100315	7.60338715
