# Supplementary material for: GENAVOS: A New Tool for Modelling and Analyzing Cancer Gene Regulatory Networks Using Delayed Nonlinear Variable Order Fractional System
Source: Preprints.org preprint supplement (doi:10.20944/preprints202011.0199.v1), 2020-11-04
Supplement: Supplementary file 1 [file supplementary › GENAVOS beta version/Data/normal cell net full.csv]

MYC	202431_s_at	8.55018069	9.12067178	8.65389452	9.14509775	9.12410693	9.02877975	8.92243086	9.02611459	8.79978906	8.88343102	8.77635411	8.66798138	8.73162302	8.6599871	8.76594611	8.96004891	8.71139146		9.12088533	9.51712616	10.48880368	10.01563547	10.01586839	9.94959737	9.73224129	9.67332813	9.40053369	9.37385731	9.49975799	9.31139982	9.27079394	9.00834943	8.92923313	8.81650961	8.8389136	8.88800213
E2F1	2028_s_at	7.87797267	7.79544007	7.91468239	7.74133237	7.4885417	7.71126119	7.08744466	7.30517651	7.73211791	7.63348036	7.73609827	7.71182619	7.55240124	7.51540237	7.41785623	7.27915106	7.32990404		6.99971716	6.91723235	6.89988476	6.8362424	6.79210176	6.81377764	6.9264303	7.12657696	7.27511794	7.43431662	7.72378441	7.59770564	7.63135262	7.75870518	7.66568173	7.80465013	7.56384931	7.63631674
E2F1	204947_at	8.22486515	8.30049895	8.31836642	7.91770098	7.71638178	7.92374121	7.45442993	7.81359422	8.09845835	8.01756014	8.14559096	7.98072623	7.80995964	7.90515894	7.84235005	7.68593161	7.69539338		7.56937267	7.41758307	7.25442598	7.40183656	7.19084938	7.42023452	7.22638725	7.65788593	7.54222893	7.85635111	8.00663414	8.00931044	8.10584634	8.18801651	8.07816796	8.02189167	7.91258741	8.01955567
RB1	203132_at	9.09407536	8.68293927	8.82266999	8.60590533	8.6105483	9.09335833	8.7435877	8.87211941	9.10299054	9.19403776	9.01133662	9.24862894	8.89520952	8.99226899	8.84452082	8.86964686	8.93913102		8.08209651	8.23278217	8.87126494	8.71740318	9.13912397	8.62468927	9.21335164	9.34279909	9.46705613	9.45366582	9.02422347	9.43002361	9.0938538	9.32968265	9.14934637	9.00815567	9.33504257	8.87428446
RB1	211540_s_at	6.18633915	6.31936946	5.98646434	6.59289498	6.38731083	5.49441195	6.11716416	6.21550242	6.46867624	6.64590545	6.48877248	6.86510826	6.52168954	6.68133479	6.51761487	5.89935182	6.21553497		6.03269311	6.20997662	6.3695254	6.46818144	6.32729129	6.23941752	6.74169766	6.32392677	6.41964738	6.47463469	6.11813546	6.74088284	6.55526518	6.62289373	6.4571007	6.42385333	6.63953557	5.92398972
CDK4	202246_s_at	10.66560255	10.66885355	10.54098609	10.63907761	10.7772018	10.62257912	10.63743716	10.57398371	10.63869578	10.68679909	10.73576709	10.71504056	10.81235095	10.76435859	10.81549483	10.69718524	10.69820421		11.030223	10.92393736	10.53574429	10.49251252	10.39313397	10.30818283	10.12336531	10.08750482	10.21530001	10.25515485	10.6105686	10.66568554	10.7106412	10.68133885	10.73170994	10.82022678	10.7637275	10.76607271
CDC25A	204695_at	8.27710462	8.3058574	8.40332611	8.05356391	8.25991465	8.44466514	8.36364918	8.25407969	8.26721093	8.1724207	7.99977335	7.80170585	7.55930976	7.67348198	7.767857	7.41072374	7.58921139		6.77479715	6.86156394	6.83207536	6.95339168	6.74534641	6.91609112	6.45700046	7.40175362	7.70251468	8.12925418	8.35316802	8.23437777	8.19716811	8.01772714	7.89266946	7.84662583	8.00356566	7.80529919
CDC25A	204696_s_at	6.77874083	6.84628227	6.65711549	6.5424273	6.5452472	6.54804687	6.29051527	6.33125249	6.66406045	6.41712526	6.43163438	6.58217166	6.21064248	6.26724541	6.36163893	6.08893256	5.97938279		5.38640686	6.02606933	5.82113147	5.92064417	5.91923638	6.03776361	5.84031332	6.25720853	6.70784987	6.75823079	6.97366076	6.87883499	6.88345886	6.81252971	6.51552527	6.80459891	6.67888631	6.44575611
CDK2	204252_at	8.80834769	8.59778752	8.82246922	8.52778387	8.4417593	8.79057606	8.50674149	8.46438369	8.81933995	8.57913833	8.60693399	8.54237187	8.6307913	8.61363363	8.54457255	8.42770164	8.45056468		7.0768415	6.70921628	7.05924553	7.20463404	7.25581883	7.33905011	7.64522515	7.723395	7.75423374	8.16119082	8.01066016	8.55068883	8.48599025	8.83563748	8.16028554	8.31330091	8.57042941	8.44373255
CDK2	211803_at	4.59635352	5.15378996	4.99273542	4.85776753	4.99298673	4.53943303	5.15136339	5.66536139	5.27226277	5.35778833	5.1061988	5.26933744	5.43165348	4.76641163	4.85212964	4.82249683	4.85970883		4.73728306	4.6345041	4.62880313	4.54906179	4.76132108	4.61908624	4.5556763	4.88709128	4.67062637	4.82380813	5.3372614	4.81033231	4.91199978	4.88996606	4.98671662	4.96783386	4.85082799	4.84573136
CDK2	211804_s_at	7.49362812	7.46287481	7.14588675	7.28406709	7.30165342	6.60278015	7.36879338	7.53410147	7.41937715	7.23756143	7.55068578	7.39494451	7.43023035	7.51613379	7.247319	6.98806848	6.92874934		6.30170358	6.47309301	6.05726647	6.22282841	6.08459183	6.38035237	6.7152801	6.4836515	6.6633795	6.98191887	7.03442834	7.3929507	7.35208257	7.84134996	7.11904252	7.24583635	7.32980031	7.12534025
CDKN1B	209112_at	8.4934755	7.64943703	7.08634566	8.09515463	8.38049168	8.83235867	8.40128019	8.35002929	8.49511977	8.62892946	8.54163192	8.94246033	8.89383424	8.98902412	8.6489538	8.56851344	8.41281156		8.7601087	9.0427985	6.41389205	6.84423602	7.53194919	7.53243149	8.14713244	8.40887939	8.75409999	8.72251455	8.35043051	8.80270804	8.82726923	9.13085871	9.13049608	8.89235735	9.16265032	8.94339279
