# Supplementary material for: GENAVOS: A New Tool for Modelling and Analyzing Cancer Gene Regulatory Networks Using Delayed Nonlinear Variable Order Fractional System
Source: Preprints.org preprint supplement (doi:10.20944/preprints202011.0199.v1), 2020-11-04
Supplement: Supplementary file 1 [file supplementary › GENAVOS beta version/Data/normalcellp53.csv]

TP53	211300_s_at	6.27713562	6.7467327	6.36753593	6.69132561	6.76342344	5.81157863	6.01521679	6.70490187	6.46194564	6.63001451	6.89807559	6.96825742	7.09266623	7.3442465	7.17504817	6.8915711	6.82226343		7.62974756	7.48534964	7.34382074	7.46858342	6.92365291	6.75578902	6.44045029	6.00873175	6.159047	6.01135402	5.71238716	6.42822326	6.59707723	6.45823671	6.59464785	7.01216895	6.62845586	6.56474749
TP53	201746_at	7.11748325	7.36986861	7.21965123	7.57936763	7.30617159	7.39666788	6.98106055	7.37126757	7.0902885	7.55418569	7.57835596	7.8818005	7.89375214	8.08009401	7.76226114	7.78896126	7.7671182		8.60672795	8.30504473	7.82852833	7.95346108	7.55090583	7.46743584	6.95323411	6.45277115	6.59328795	6.54797536	6.16029946	6.88416305	6.88550436	7.02876961	7.36589697	7.65362245	7.27039465	7.47765499
E2F1	2028_s_at	7.87797267	7.79544007	7.91468239	7.74133237	7.4885417	7.71126119	7.08744466	7.30517651	7.73211791	7.63348036	7.73609827	7.71182619	7.55240124	7.51540237	7.41785623	7.27915106	7.32990404		6.99971716	6.91723235	6.89988476	6.8362424	6.79210176	6.81377764	6.9264303	7.12657696	7.27511794	7.43431662	7.72378441	7.59770564	7.63135262	7.75870518	7.66568173	7.80465013	7.56384931	7.63631674
E2F1	204947_at	8.22486515	8.30049895	8.31836642	7.91770098	7.71638178	7.92374121	7.45442993	7.81359422	8.09845835	8.01756014	8.14559096	7.98072623	7.80995964	7.90515894	7.84235005	7.68593161	7.69539338		7.56937267	7.41758307	7.25442598	7.40183656	7.19084938	7.42023452	7.22638725	7.65788593	7.54222893	7.85635111	8.00663414	8.00931044	8.10584634	8.18801651	8.07816796	8.02189167	7.91258741	8.01955567
MDM2	211832_s_at	4.99957554	5.34272253	5.00105945	5.27030317	5.31301218	5.2834492	4.92311869	5.17216129	5.07316645	5.31074965	5.35091967	5.23305953	5.0358479	5.36026236	5.40450258	5.15910919	4.85978648		5.57528075	5.30316384	5.57475001	5.24127448	5.36306037	5.05985901	5.31801759	4.96133367	4.83284759	4.83860782	4.89914516	4.82455539	4.93167053	4.91588447	4.76271183	4.97942117	4.87055592	4.92944667
MDM2	217373_x_at	5.58552428	5.90419175	5.69667936	6.14770507	5.98502208	5.24740836	5.90061933	5.72776432	5.83703355	5.95645272	6.11170467	6.38494986	6.09786665	6.2098507	6.17573695	6.05880202	6.15523939		6.62051773	6.45552659	6.53624011	6.23780185	6.73688409	6.10272282	6.43312754	5.89618576	5.93252855	5.77598794	5.67343596	5.81431773	5.70817895	5.7351264	5.80058376	5.59652813	5.82558429	5.85303632
MDM2	217542_at	5.89470974	5.67874246	5.6358742	5.61662402	6.23984926	6.19467934	5.72058016	5.66390978	5.65785363	5.98138737	5.52201405	5.64729529	5.76244671	5.6803964	5.89042753	5.93734481	5.70563796		6.45766353	5.96988187	6.47192871	5.99055591	6.56998978	6.10557005	6.50698068	6.15171997	5.94715479	5.92671392	5.50043946	5.7495431	5.56350434	5.69518838	5.52082184	5.43054877	5.87584099	5.62903628
MDM2	205385_at	5.7205737	5.47447161	5.71881039	5.74638033	5.83111498	5.6122237	6.42298478	5.99767403	5.84067173	6.06645103	5.79577329	5.98802391	5.66687894	5.69059644	5.66507476	5.44136289	5.55467179		5.8546923	6.03647195	6.00266481	5.69228169	5.85148452	5.79414419	5.70876214	5.67895212	5.48617041	5.72310292	5.97110691	5.83878092	5.81965783	5.90046884	5.69066939	5.54240678	5.73416143	5.53283601
MDM2	205386_s_at	5.31483305	4.99431412	4.73495888	5.26093642	4.7441094	4.49394351	5.01305379	4.89252376	4.98900317	5.36473672	5.2971819	5.52160664	5.43061194	5.21812396	5.23015318	5.141824	5.3163489		5.09650584	4.75630041	5.409038	4.69222495	5.28357881	4.49749037	5.21582459	4.46541731	4.55986611	4.34007748	3.85641306	4.72732444	4.28197961	4.47315988	4.55455625	4.56808355	4.47214929	4.07890665
ARF	209644_x_at	8.24573015	8.08395471	8.23299833	8.27383856	8.11079468	8.32655569	7.99495293	7.99458762	8.29894861	8.32819845	8.2543749	8.18818181	8.41734803	8.48270015	8.30728757	8.49378358	8.42281251		8.7510657	8.8108236	8.48696694	8.50340109	8.52306968	8.45846022	8.39353911	8.30321387	8.24697	8.21417121	8.45767732	8.2824215	8.44673835	8.29772556	8.34460069	8.12685881	8.32261203	8.48112864
ARF	211156_at	5.43136645	5.38183031	5.43019602	5.61668301	5.5930231	5.63718655	5.60359826	6.34342983	5.65684781	5.50482268	5.59851551	5.54420962	5.44731082	5.51467554	5.59228355	5.50308529	5.83609685		5.68569414	5.70313762	5.31541543	5.21396163	5.57422333	5.51822261	5.35793691	5.15101771	5.22735975	5.28707434	5.73950354	5.52682395	5.57451623	5.27871572	5.3327056	5.29647184	5.36058781	5.38516165
ARF	207039_at	6.69464302	6.48128637	6.5580148	6.54638711	6.64243081	6.80847044	6.21987805	6.53155362	6.59393159	6.75915437	6.40032118	6.56668334	6.78493495	6.67994931	6.64364125	6.80321932	6.67878652		7.27497127	7.17496475	7.07483756	7.17296905	7.11584052	6.91269566	6.97959199	6.67104972	7.01312008	6.79675712	6.34874208	6.68385026	6.51652836	6.50032543	6.45703114	6.30139816	6.40748103	6.3806994
