# Supplementary material for: GENAVOS: A New Tool for Modelling and Analyzing Cancer Gene Regulatory Networks Using Delayed Nonlinear Variable Order Fractional System
Source: Preprints.org preprint supplement (doi:10.20944/preprints202011.0199.v1), 2020-11-04
Supplement: Supplementary file 1 [file supplementary › GENAVOS beta version/Data/normalcellp53m.csv]

TP53	7.11748325	7.36986861	7.21965123	7.57936763	7.30617159	7.39666788	6.98106055	7.37126757	7.0902885	7.55418569	7.57835596	7.8818005	7.89375214	8.08009401	7.76226114	7.78896126	7.7671182
E2F1	7.87797267	7.79544007	7.91468239	7.74133237	7.4885417	7.71126119	7.08744466	7.30517651	7.73211791	7.63348036	7.73609827	7.71182619	7.55240124	7.51540237	7.41785623	7.27915106	7.32990404
MDM2	5.58552428	5.90419175	5.69667936	6.14770507	5.98502208	5.24740836	5.90061933	5.72776432	5.83703355	5.95645272	6.11170467	6.38494986	6.09786665	6.2098507	6.17573695	6.05880202	6.15523939
ARF	8.24573015	8.08395471	8.23299833	8.27383856	8.11079468	8.32655569	7.99495293	7.99458762	8.29894861	8.32819845	8.2543749	8.18818181	8.41734803	8.48270015	8.30728757	8.49378358	8.42281251
