# Supplementary material for: GENAVOS: A New Tool for Modelling and Analyzing Cancer Gene Regulatory Networks Using Delayed Nonlinear Variable Order Fractional System
Source: Preprints.org preprint supplement (doi:10.20944/preprints202011.0199.v1), 2020-11-04
Supplement: Supplementary file 1 [file supplementary › GENAVOS beta version/fixpoi.m]

global yal;
global np;
global BestSol
global top
N=1;
% syms y x
y = sym('y', [size(top,1) size(top,1)+1]);
x = sym('x', [size(top,1) 1]);
fp = sym('fp', [size(top,1) 1]);
p=BestSol.Position(1,1:np)./20;
r=(BestSol.Position(1,(np+1):(np+yal)));


k=0;
g=0;
for i=1:size(top,1)
for j=1:size(top,2)
    if top(i,j)==1
        k=k+1;
        kk=k-g;
       
      y(i,j)=round(p(k),1).*logsigp(round(r(kk),1),N,x(j,1)); 
    end
    if top(i,j)==-1
        k=k+1;
        kk=k-g;
      y(i,j)=round(p(k),1)*logsign(round(r(kk),1),N,x(j,1)); 
    end
    if j==size(top,2)
        k=k+1;
        g=g+1;
        
    y(i,j+1)=-round(p(k),1)*x(i,1); 
    end
end
end
topp=[abs(top) ones(size(top,1),1)];
y=topp.*y;
for i=1:size(top,1)
    fp(i,1)=sum(y(i,:));
end
