# Supplementary material for: GENAVOS: A New Tool for Modelling and Analyzing Cancer Gene Regulatory Networks Using Delayed Nonlinear Variable Order Fractional System
Source: Preprints.org preprint supplement (doi:10.20944/preprints202011.0199.v1), 2020-11-04
Supplement: Supplementary file 1 [file supplementary › GENAVOS beta version/memo.m]

function [yo] = memo(r, c, k)
%
temp = 0;
for j=1:k-1
   temp = temp + c(j)*r(k-j);
end
yo = temp;
%
