# Supplementary material for: GENAVOS: A New Tool for Modelling and Analyzing Cancer Gene Regulatory Networks Using Delayed Nonlinear Variable Order Fractional System
Source: Preprints.org preprint supplement (doi:10.20944/preprints202011.0199.v1), 2020-11-04
Supplement: Supplementary file 1 [file supplementary › GENAVOS beta version/metadata.m]

global BestSol2
global or2;
global too2;
CreateStruct.Interpreter = 'tex';
CreateStruct.WindowStyle = 'non-modal';
f = msgbox('\fontsize{20} Please enter comparative data',CreateStruct);
pause(1)
close(f);
[file1,path1] = uigetfile('*.mat','Select One File');  
ort=load([path1,file1]);
or2=ort.or1;
BestSol2=ort.BestSol;
too2=ort.To;
CreateStruct.Interpreter = 'tex';
CreateStruct.WindowStyle = 'non-modal';
f = msgbox('\fontsize{20} Data was loaded successfully.',CreateStruct);
pause(2);
close(f);
