# Supplementary material for: GENAVOS: A New Tool for Modelling and Analyzing Cancer Gene Regulatory Networks Using Delayed Nonlinear Variable Order Fractional System
Source: Preprints.org preprint supplement (doi:10.20944/preprints202011.0199.v1), 2020-11-04
Supplement: Supplementary file 1 [file supplementary › GENAVOS beta version/mkfd.m]

function y=mkfd(x,nmax,nmin)
y=(x-min(x))./(max(x)-min(x)).*(nmax-nmin)+nmin;
