# Supplementary material for: GENAVOS: A New Tool for Modelling and Analyzing Cancer Gene Regulatory Networks Using Delayed Nonlinear Variable Order Fractional System
Source: Preprints.org preprint supplement (doi:10.20944/preprints202011.0199.v1), 2020-11-04
Supplement: Supplementary file 1 [file supplementary › GENAVOS beta version/mkfrbf1.m]

function y=mkfrbf1(h,TSim,To,k,c)
y=0;
c=abs(c);
n=round(TSim/h);
if To==0
    m=-1;
else
m=round(To/h);
end
x=-m*h:h:TSim;
for i=1:size(c,2)
    y=y+k(i).*exp(-(abs(x-c(i))).^2);
end
y=(y-min(y))./(max(y)-min(y));
