# Supplementary material for: GENAVOS: A New Tool for Modelling and Analyzing Cancer Gene Regulatory Networks Using Delayed Nonlinear Variable Order Fractional System
Source: Preprints.org preprint supplement (doi:10.20944/preprints202011.0199.v1), 2020-11-04
Supplement: Supplementary file 1 [file supplementary › GENAVOS beta version/pgp.m]

global top;
global BestSol;
global np;
global cjj;
cjj=[];
cjj(1,top(1,:)~=0)=BestSol.Position((np+1):np+sum(sum(top(1,:)~=0)));
% cjj(1,top(1,:)==0)=NaN;
% cjj(1,size(top,2)+1)=BestSol.Position(np+sum(sum(top(1,:)~=0))+1);

for jj=2:size(top,1)
cjj(jj,top(jj,:)~=0)=BestSol.Position((sum(sum(top(1:jj-1,:)~=0))+np+1):(np+sum(sum(top(1:jj,:)~=0))+0));
% djj(jj,top(1,:)==0)=NaN;
% cjj(jj,size(top,2)+1)=BestSol.Position(sum(sum(top(1:jj,:)~=0))+jj);
end
% djj=djj./20;

cjj(top==0)=NaN;
cjj=round(cjj,2);
% sum(sum(~isnan(djj(1:4,:))))+sum(~isnan(djj(5,1:5)))
