# Supplementary material for: GENAVOS: A New Tool for Modelling and Analyzing Cancer Gene Regulatory Networks Using Delayed Nonlinear Variable Order Fractional System
Source: Preprints.org preprint supplement (doi:10.20944/preprints202011.0199.v1), 2020-11-04
Supplement: Supplementary file 1 [file supplementary › GENAVOS beta version/ploterror.m]

global BestCost
global MeanCost
figure;
semilogy(BestCost,'b','LineWidth',2);
hold on;
semilogy(MeanCost,'r:','LineWidth',2);
grid on;
legend('Best Cost','Mean Cost');
xlabel('Decade');
ylabel('Sum of Absolute Error');
ax = gca;
ax.FontSize = 15;
ax.LineWidth=1.5;
