# Supplementary material for: GENAVOS: A New Tool for Modelling and Analyzing Cancer Gene Regulatory Networks Using Delayed Nonlinear Variable Order Fractional System
Source: Preprints.org preprint supplement (doi:10.20944/preprints202011.0199.v1), 2020-11-04
Supplement: Supplementary file 1 [file supplementary › GENAVOS beta version/postresult.m]

global pl;
a=find(pl==0);
global sampletime
global or1;
global BestSol
% global gnum;
global TSim
global h;
global sameor;
global inse;
global Y0;
global Df;
global t;
global To;
global G1;
refp=size(a,2);

sameor=1;
n=round(TSim/h);
m=round(To/h);
a1=-m:n;
b=size(a1,2);
t=-m*h:h:TSim;
if inse==1
Y0=inse.*Df(:,1);
[e,T,Y,yh,or1]=MEPE53(BestSol.Position);
elseif inse~=1
Y0=Df(:,1);
[e1,T1,Y1,yh1,~]=MEPE53(BestSol.Position);
Y0=inse.*Df(:,1);
[e,T,Y,yh,or1]=MEPE53(BestSol.Position);
end
% figure
% for i=1:size(a,2)
% subplot(ceil(refp/2),2,i)
% plot(0:sampletime:TSim,yh(a(1,i),:)','o',0:sampletime:TSim,Y(1:sampletime/h:end,a(1,i)),'LineWidth',1.5);
% % xlabel('Time(Hour)');
% ylabel(sprintf('%s',char(G1(a(1,i),1))));
% % title(sprintf('State Variable %s',char(G1(a(1,i),1))));
% grid on;
% ax = gca;
% ax.FontSize = 12;
% ax.LineWidth=1.5;
% end
figure(1)

for i=1:size(a,2)
subplot(ceil(refp/2),2,i)
if inse==1
plot(0:sampletime:TSim,yh(a(1,i),:)','o',0:h:(TSim-h),Y(1:end,a(1,i)),0:sampletime:TSim,yh(a(1,i),:)','.','LineWidth',1.5);
elseif inse~=1
plot(0:sampletime:TSim,yh(a(1,i),:)','o',0:h:(TSim-h),Y(1:end,a(1,i)),0:sampletime:TSim,yh(a(1,i),:)','.',0:h:(TSim-h),Y1(1:end,a(1,i)),'LineWidth',1.5);  
hold on
end
% xlabel('Time(Hour)');
ylabel(sprintf('%s',char(G1(a(1,i),1))));
% title(sprintf('State Variable %s',char(G1(a(1,i),1))));    
grid on;
ax = gca;
ax.FontSize = 12;
ax.LineWidth=1.5;
end
sh=[0.238266363745563,-0.004112520413613,0.554904818294862,0.071428569583666];
lgd=legend(sprintf('Real Data'),sprintf('Simulated Signals'),sprintf('Sum of Absolute Error=%s',num2str(e)));
lgd.NumColumns = 3;
lgd.Position=sh;
lgd.Box='off';
lgd.FontSize=15;

k=0;
figure
for i=1:(size(a,2)-1)
 for j=(i+1):size(a,2)
   k=k+1;  
    subplot(ceil(refp*(refp-1)/(6)),3,k)
    plot(Y(1:end,a(1,i)),Y(1:end,a(1,j)),'-','LineWidth',1.5);
    xlabel(sprintf('%s',char(G1(a(1,i),1))));
    ylabel(sprintf('%s',char(G1(a(1,j),1))));
    grid on;
    ax = gca;
    ax.FontSize = 12;
    ax.LineWidth=1.5;
 end
end
% sh=ax.OuterPosition-[0.25,0.06,0.0,0.25];
lgd=legend('Phase Plane');
lgd.NumColumns = 1;
lgd.Position=[0.434459623254944,0.956448390739309,0.115666176289276,0.046012268750214];
lgd.Box='off';
lgd.FontSize=15;
figure
for i=1:size(a,2)
 
    subplot(ceil(refp/2),2,i)
    plot(t,or1(a(1,i),:)','LineWidth',1.5);
%     xlabel('Time(Hour)');
    title(sprintf('Order function of %s',char(G1(a(1,i),1))));    
    grid on;
    ax = gca;
    ax.FontSize = 12;
    ax.LineWidth=1.5;
end
