# Supplementary material for: GENAVOS: A New Tool for Modelling and Analyzing Cancer Gene Regulatory Networks Using Delayed Nonlinear Variable Order Fractional System
Source: Preprints.org preprint supplement (doi:10.20944/preprints202011.0199.v1), 2020-11-04
Supplement: Supplementary file 1 [file supplementary › GENAVOS beta version/ss1.m]

global G1;
global ss
ss={};
ss{1,1}=[];
global cjj;


for i=1:size(G1,1)
    ss(1,i+1)=G1(i);
end
for i=1:size(G1,1)
    ss(i+1,1)=G1(i);
end

for i=1:size(cjj,1)
    for j=1:size(cjj,2)
    ss{(i+1),(j+1)}=(cjj(i,j));
    end
end
