# Supplementary material for: GENAVOS: A New Tool for Modelling and Analyzing Cancer Gene Regulatory Networks Using Delayed Nonlinear Variable Order Fractional System
Source: Preprints.org preprint supplement (doi:10.20944/preprints202011.0199.v1), 2020-11-04
Supplement: Supplementary file 1 [file supplementary › GENAVOS beta version/ssd1.m]

global G1;
global ssd
ssd={};
ssd{1,1}=[];
global djj;


for i=1:size(G1,1)
    ssd(1,i+1)=G1(i);
end
for i=1:size(G1,1)
    ssd(i+1,1)=G1(i);
end

for i=1:size(djj,1)
    for j=1:size(djj,2)
    ssd{(i+1),(j+1)}=(djj(i,j));
    end
end
ssd{1,end}='Degradation';
