# Supplementary material for: GENAVOS: A New Tool for Modelling and Analyzing Cancer Gene Regulatory Networks Using Delayed Nonlinear Variable Order Fractional System
Source: Preprints.org preprint supplement (doi:10.20944/preprints202011.0199.v1), 2020-11-04
Supplement: Supplementary file 1 [file supplementary › Genavos Help.docx]

**How to use GENAVOS?**

By running the GENAVOS program, a screen will appear below the skeleton that shows the software environment. We have divided the different parts of this environment into 4 main pieces A, B, C, D, which we will explain in the following.


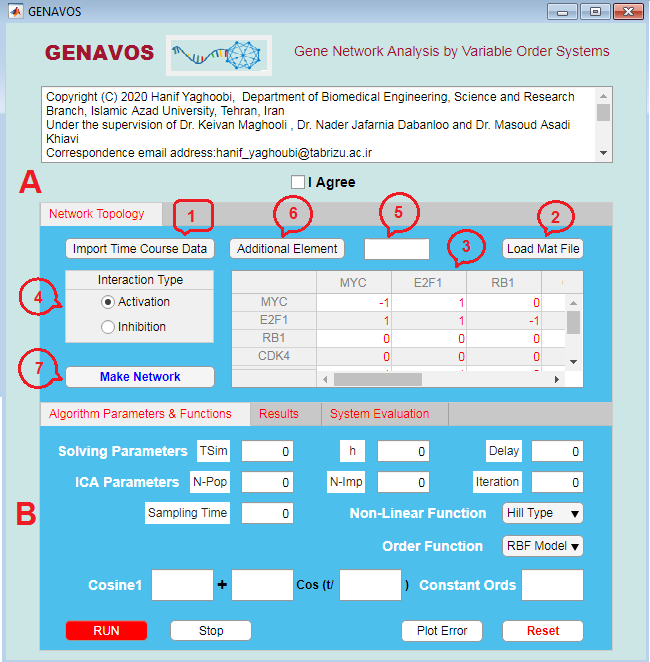


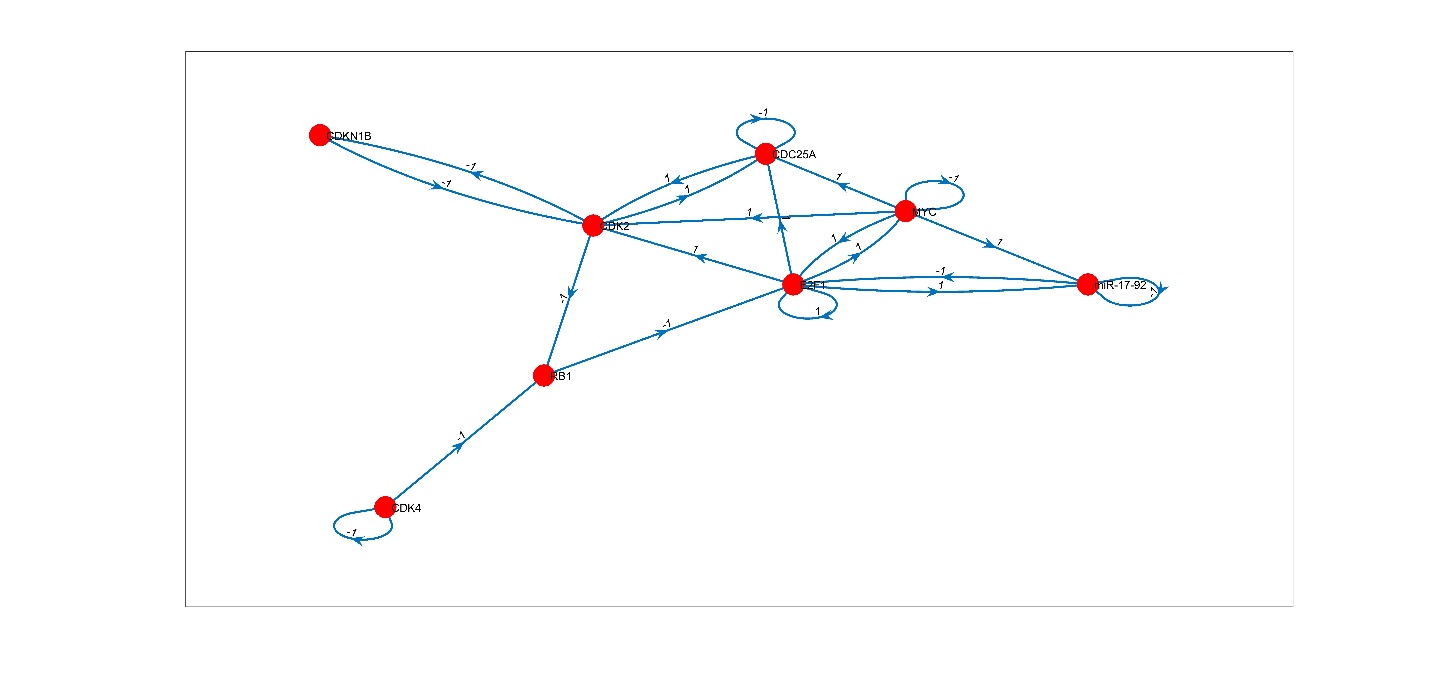
 **Section A**

This section deals with entering data and creating a network structure, which we describe in sequence.

1. In this section, we first import time series data in CSV format. An example of the data is in the Data folder.

2. This section is also for data entry. If the data is in MAT format, we can use this option. Here we can also re-import the previously analyzed Mat file and view the results directly in the software or re-analyze if necessary.

3. In this matrix, by selecting each of the components, we determine the structural relationships of the network. This part depends on the Interaction Type part. Therefore, for each element of the matrix related to the network graph, first select the connection type from 4 and then click on that element. Depending on the connection type selected, the matrix element changes from state 0 to 1 or -1 by clicking.

4. We act according to what we explained in 3.

5. If the network structure has a data-less module such as miRNA, in this rectangle we write the name of that module. Then we press the 6 key. We see that the name of that module is added to the list of matrices for which the structural relationships in the network graph must also be specified.

6. We act according to 5.

7. By pressing this key, a network graph is drawn. An example of this graph can be seen in the figure below.

**Section B**

This section deals with numerical solution, identification and optimization of system parameters.

In the TSim rectangle we enter the simulation time, in the h rectangle we enter the simulation time step, in the Delay rectangle we enter the time delay of the whole system and in the Sampling Time rectangle we enter the data sampling interval. Also, the N-Pop, N-Imp, and Iteration rectangles are related to the initial population number, the number of imperialists, and the number of iterations of the ICA algorithm, respectively.

The Non-Linear Function option is for selecting the non-linear relationship between genes, which includes two options: Hill and Log-Sigmoid.

The Order Function option is for selecting the approximate function for the system variable, which includes the RBF-Neural Network, Fourier Series, Constant, and Cosine options. In the rectangles opposite Cosine 1 or Constant, we can define these functions manually.

Pressing the RUN key starts the simulation. Here a Wait-bar appears as follows, showing the number of iterations executed by the algorithm and the total value of the absolute value (SAE) of the system.


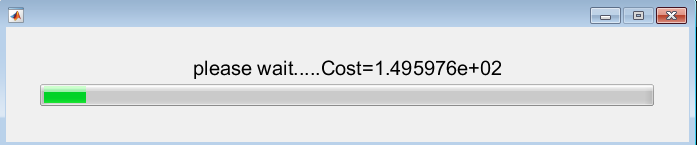


Wherever necessary, we can stop the simulation with the Stop key. In this case, the simulation results are available by then.

With the plot Error option, the SAE function is plotted in the number of iterations.

The RESET key is to clear the memory and reset it.

**Section C**

This section appears by selecting the Results option from the toolbar at the bottom of the software as follows.


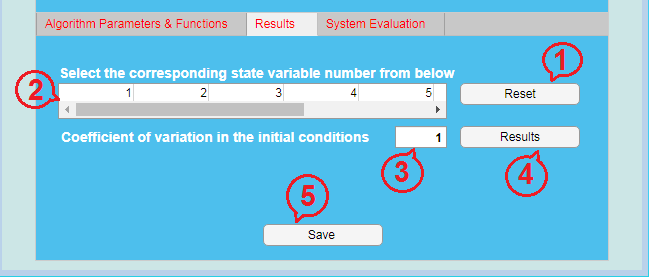


1. Used to reset parameters and results. We may change one or more parameters during the analysis. By pressing Reset, all values ​​return to the state after the simulation.

2. This matrix is ​​a selection of system mode variables for analyzing and plotting graphs. By clicking on the number corresponding to the system variable, that number becomes zero, which means that am is selected. For example, if we click on the number 2, it means that we have selected the mode variable 2 and it becomes zero.

3. We use this rectangle to change the initial conditions. The number entered in this rectangle is multiplied by the initial conditions of the system.

4. By pressing Results, the time signals, phase plane and table of values ​​of the parameters obtained from the simulation appear as follows.


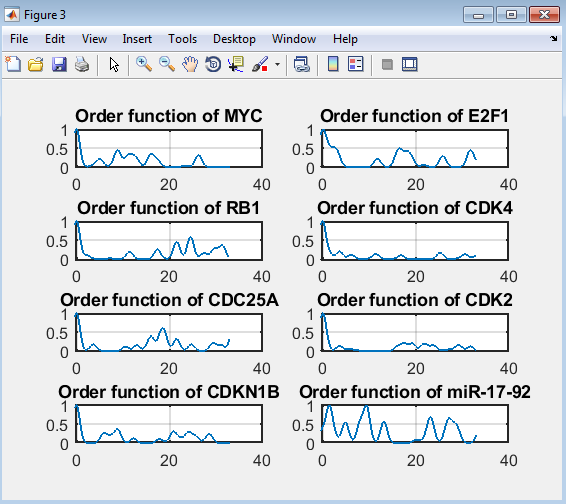


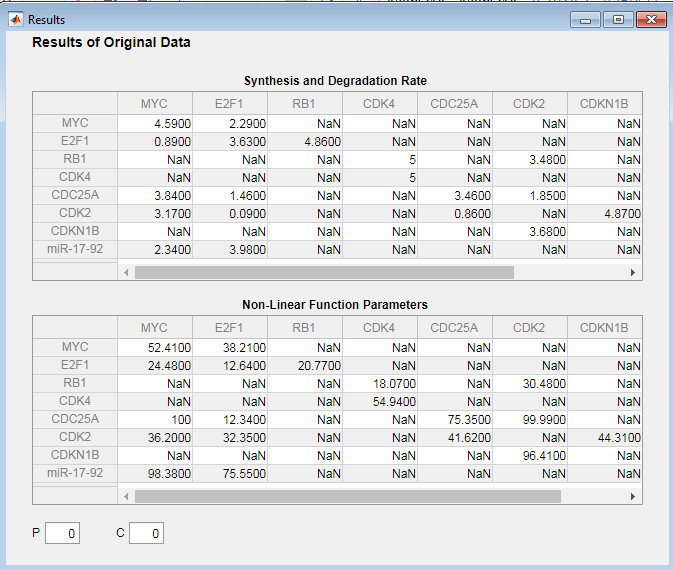


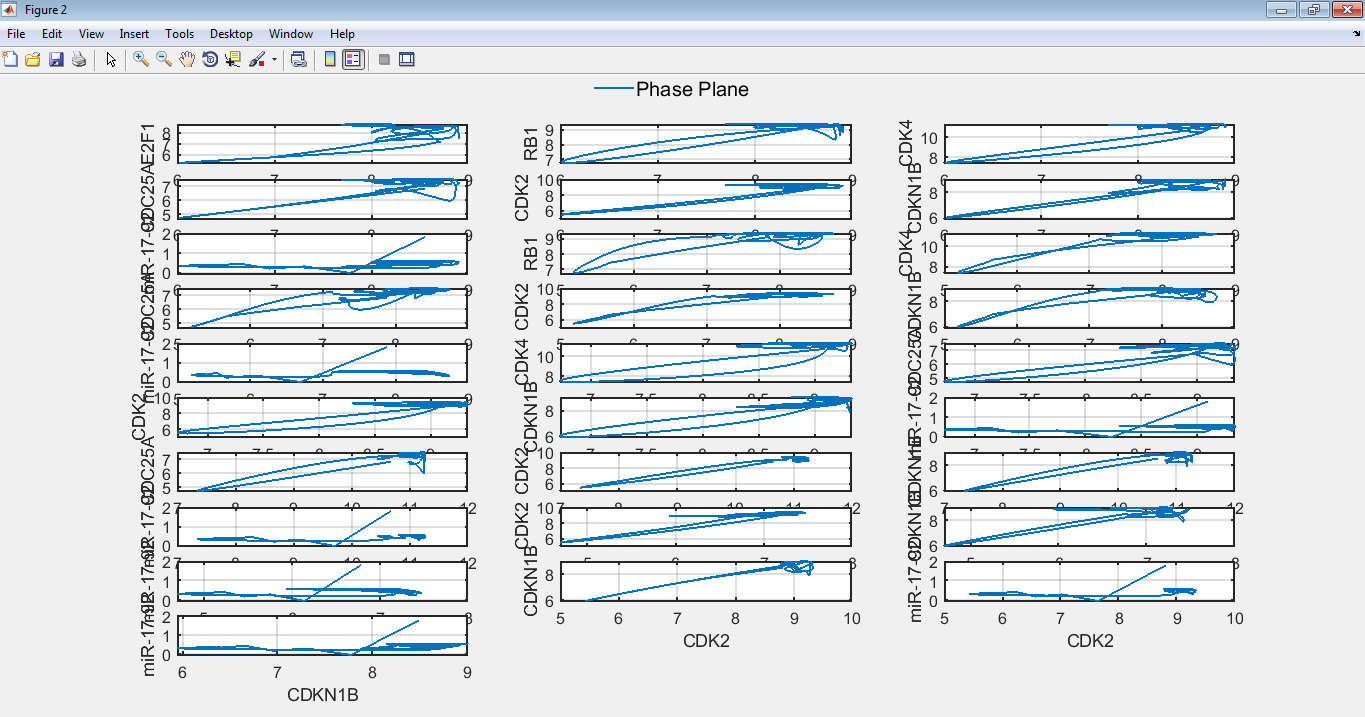


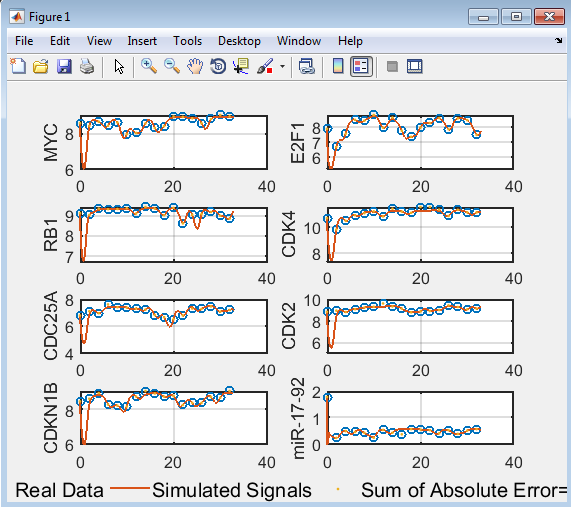


In the Parameters table, by clicking on each element of the table, the corresponding variable number will appear at the bottom. (Opposite the letters P and C). Also, the whole table is copied automatically, which can be pasted in Word or Excel.

5. The Save key saves all results as a Mat file.

**Section D**

This section appears as follows by selecting the System Evaluation option from the toolbar at the bottom of the software.


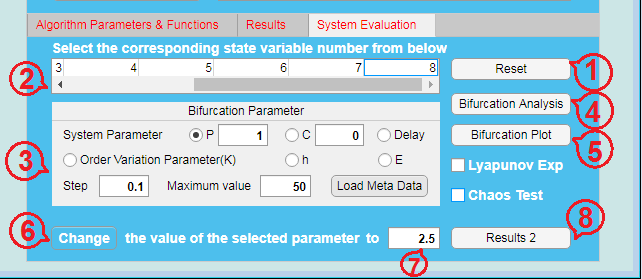


1. Similar to the Reset key in part C.

2. Similar to Part C.

3. Here the bifurcation parameter is selected. In the Step rectangle, the time step of the diagram and in the Maximum Value rectangle, the maximum value of the bifurcation parameter is selected. The minimum value of the parameters is zero by default.

4. By pressing this key, bifurcation analysis is performed.

5. By pressing this key, bifurcation diagrams are drawn for the state variables selected by part 2.

6. By pressing this key, we can change any of the parameters selected in Section 3. For this purpose, we write the new value of the parameter in 7 and press the Change key.

7. We act according to section 6.

8. By pressing this key, new results resulting from changing the parameters will appear. There are two checklists at the top of this key. The first is related to the calculation of Lyapunov Exponent and the second is related to the 0-1 chaos test. If you select them, their results will also appear by pressing Results2.
