# Supplementary material for: GENAVOS: A New Tool for Modelling and Analyzing Cancer Gene Regulatory Networks Using Delayed Nonlinear Variable Order Fractional System
Source: Preprints.org preprint supplement (doi:10.20944/preprints202011.0199.v1), 2020-11-04
Supplement: Supplementary file 1 [file supplementary › Supplementary Results .docx]

**Supplementary Results**

1. Supplementary Tables

| Parameter | *PR* | *L -U* | *Nit* | *Npop* | *NImp* | Beta | Zeta |
| --- | --- | --- | --- | --- | --- | --- | --- |
| Value | 0.3 | 0-100 | 1000 | 100 | 8 | 0.2 | 0.1 |

Supplementary Table 1. Imperialist Competitive Algorithm Parameters

Supplementary Table 2. values of the obtained parameters of normal cell system

|  | MYC | E2F1 | RB1 | CDK4 | CDC25A | CDK2 | CDKN1B | miR-17-92 | Degradation |
| --- | --- | --- | --- | --- | --- | --- | --- | --- | --- |
| MYC | 4.59 | 2.29 | -- | -- | -- | -- | -- | -- | 0.47 |
| E2F1 | 0.89 | 3.63 | 4.86 | -- | -- | -- | -- | 5 | 0.75 |
| RB1 | -- | -- | -- | 5 | -- | 3.48 | -- | -- | 0.86 |
| CDK4 | -- | -- | -- | 5 | -- | -- | -- | -- | 0.4 |
| CDC25A | 3.84 | 1.46 | -- | -- | 3.46 | 1.85 | -- | -- | 0.42 |
| CDK2 | 3.17 | 0.09 | -- | -- | 0.86 | -- | 4.87 | -- | 0.46 |
| CDKN1B | -- | -- | -- | -- | -- | 3.68 | -- | -- | 0.36 |
| miR-17-92 | 2.34 | 3.98 | -- | -- | -- | -- | -- | 1.86 | 0.9 |

1. Supplementary Figures

**
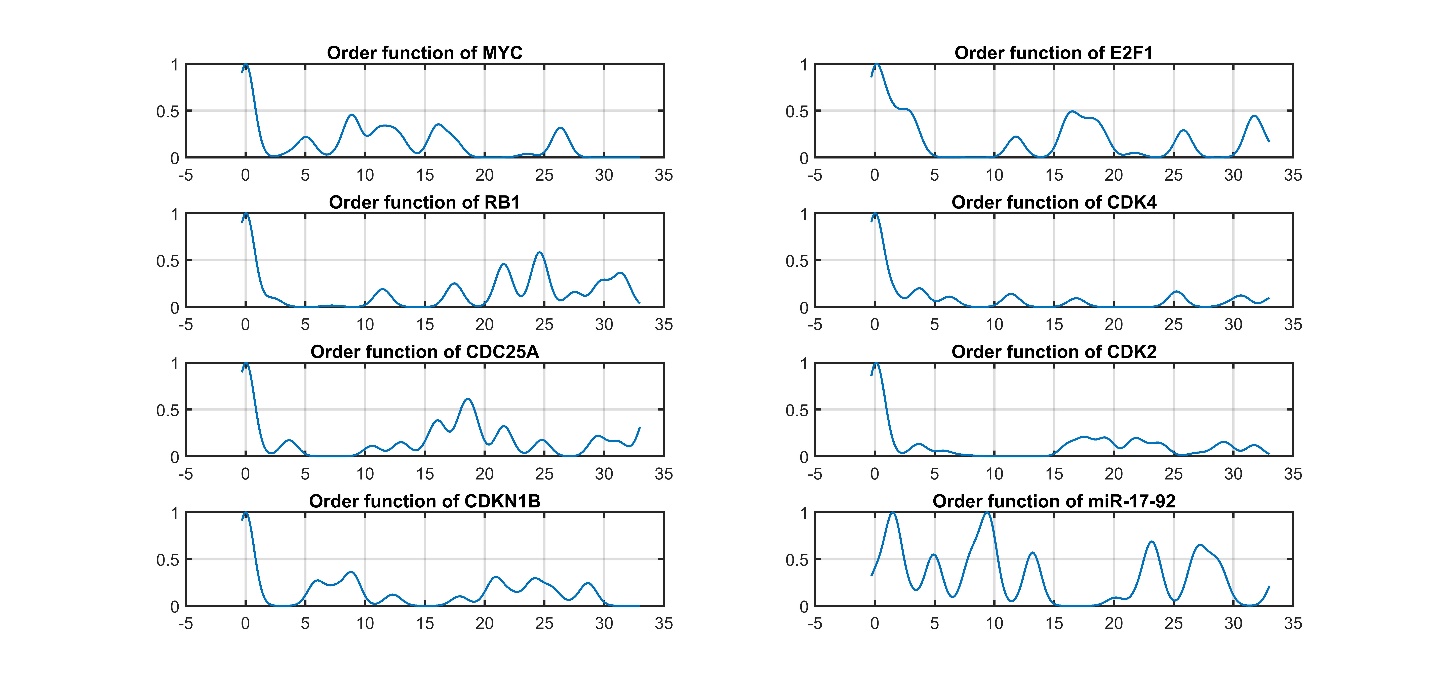
**

Supplementary Figure 1. Variable order functions of cancer cell system approximated by RBF neural network


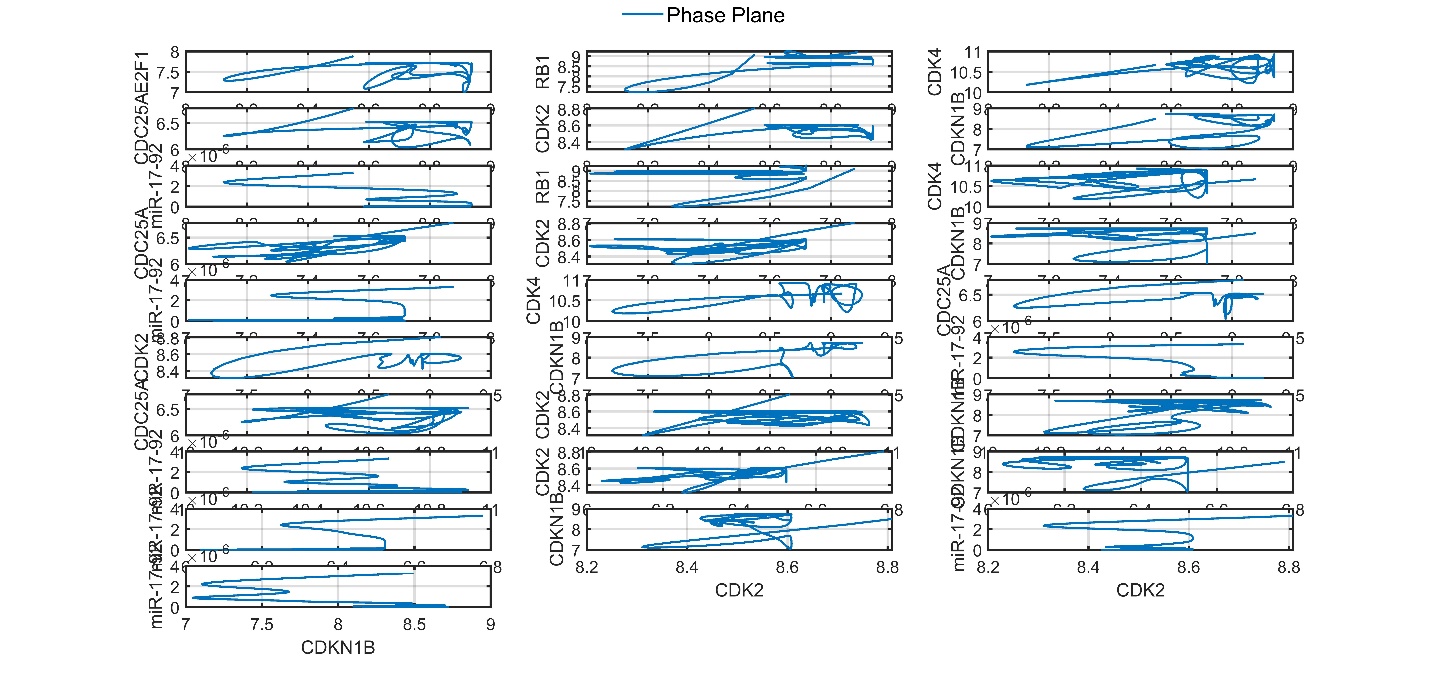


Supplementary Figure 2. Phase plane diagrams of normal cell system


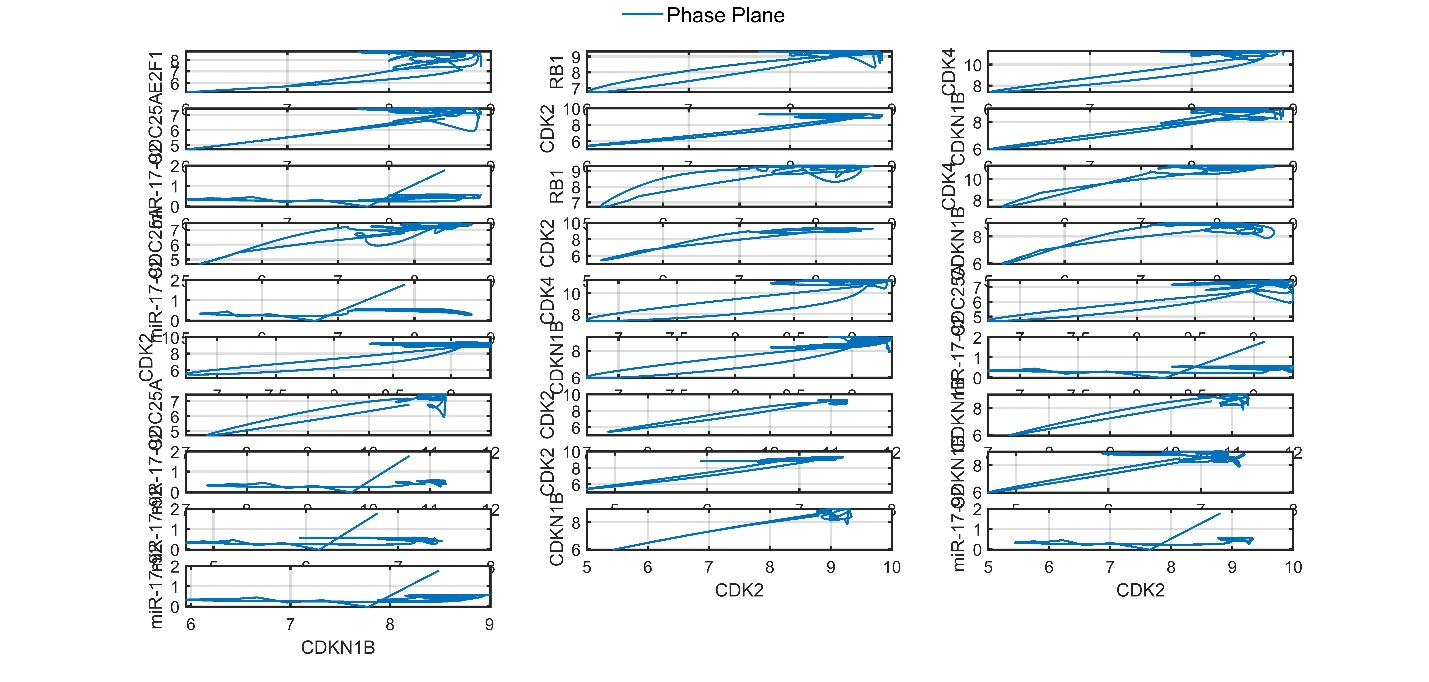


Supplementary Figure 3. Phase plane diagrams of cancer cell system


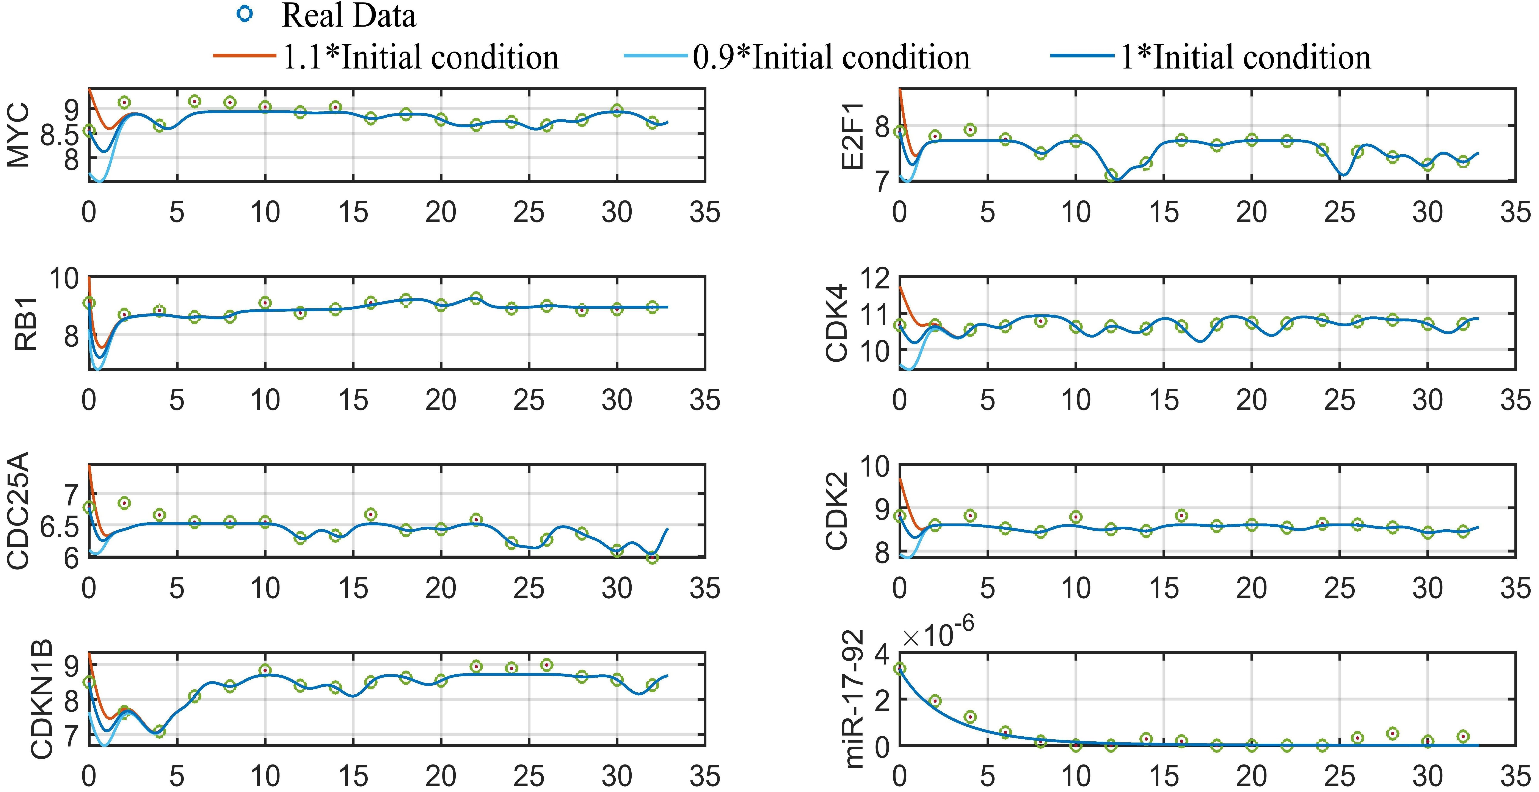


Supplementary Figure 4. Normal cell system response to changing initial conditions. In this figure, the initial conditions are up and down with a coefficient of 1.1 and 0.9.


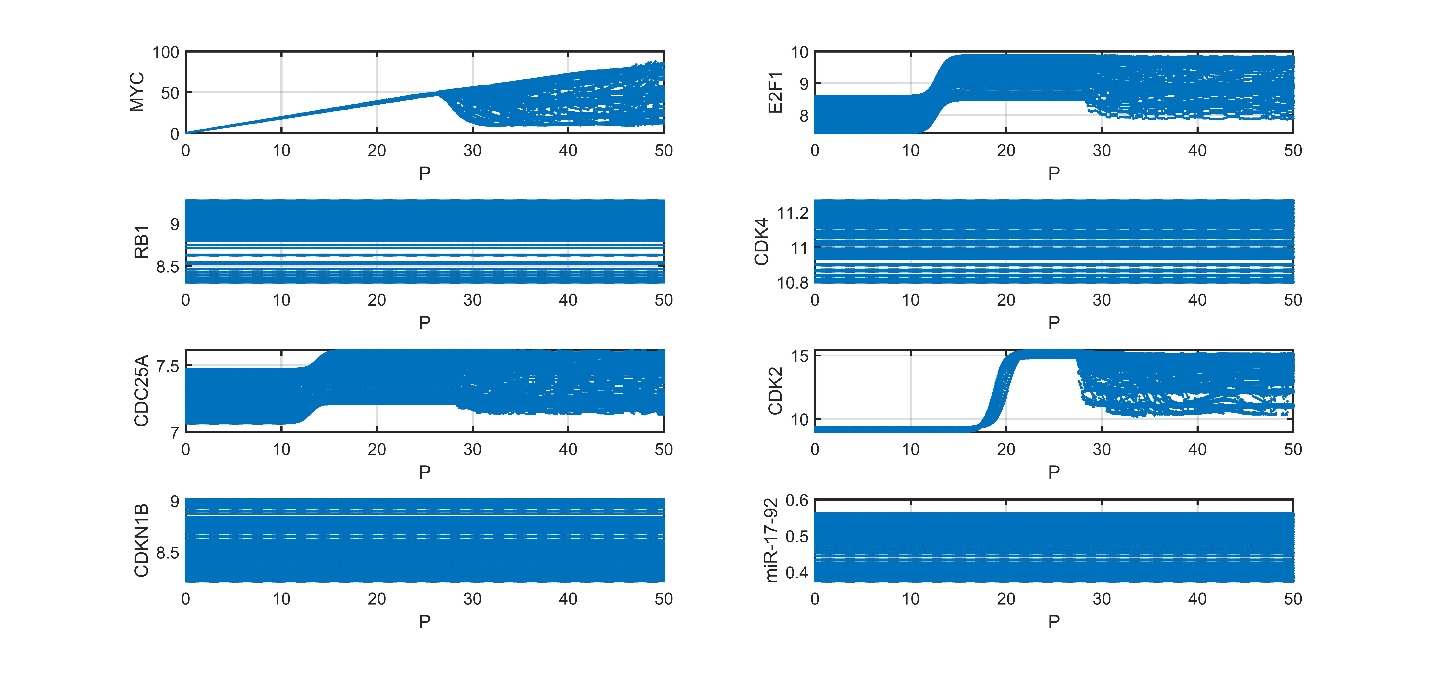


Supplementary Figure 5. Bifurcation diagram for changing MYC Self-Synthesis Rate in cancer cell


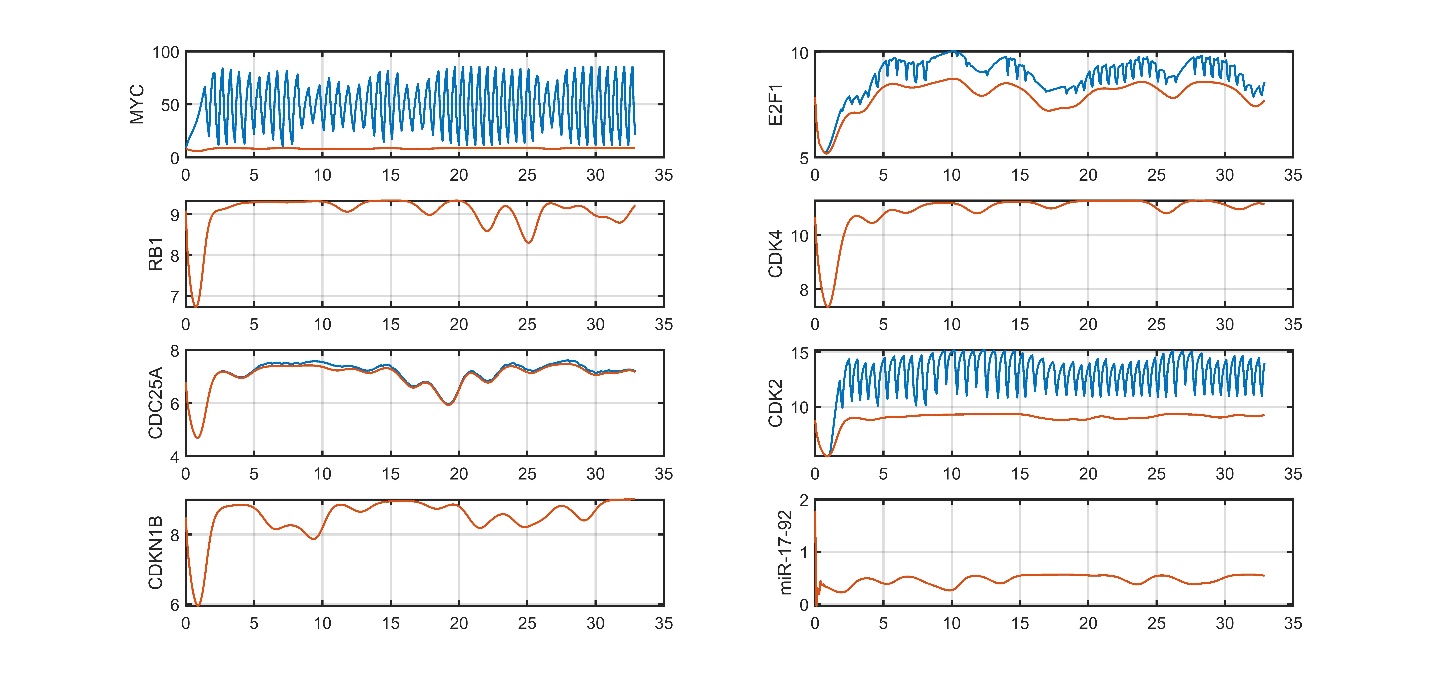


Supplementary Figure 6. Cancer cell system response to MYC Self-Synthesis Rate =50


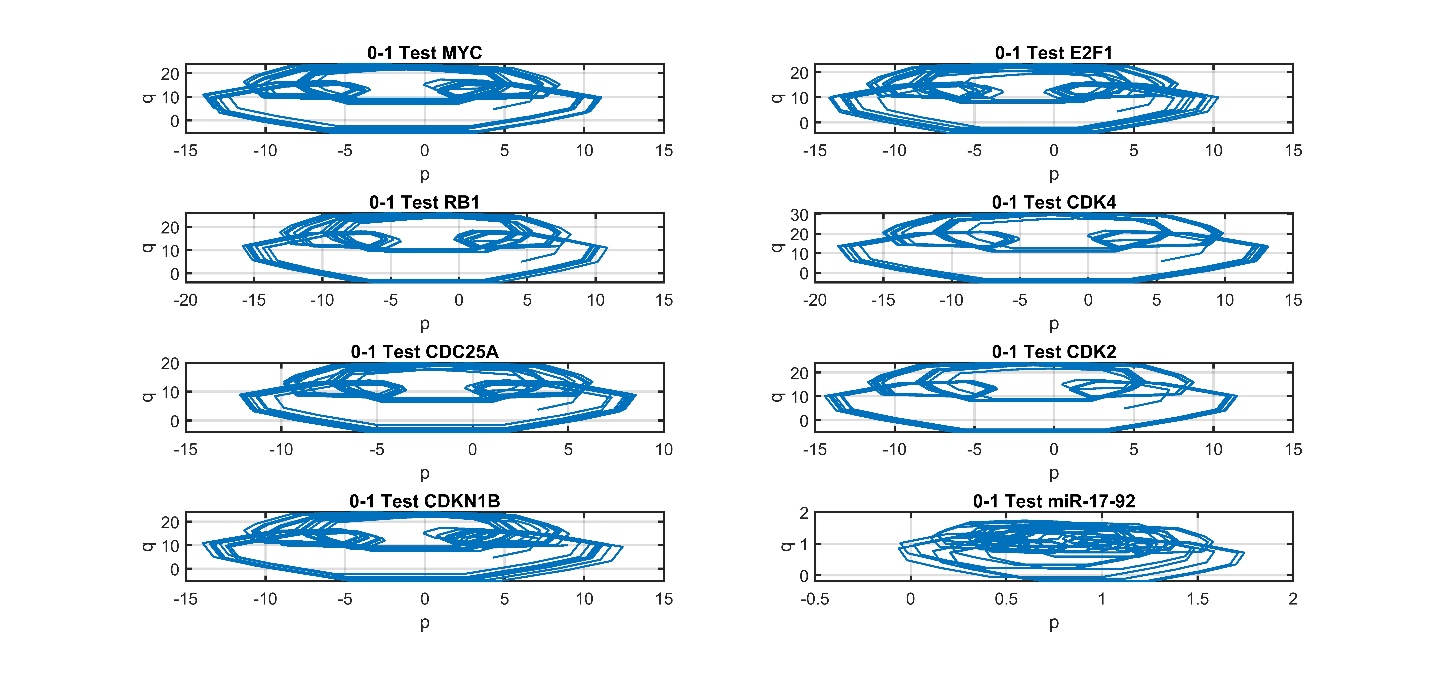


Supplementary Figure 7. Q-p plots for cancer cell
