# Supplementary figures and images for: GENAVOS: A New Tool for Modelling and Analyzing Cancer Gene Regulatory Networks Using Delayed Nonlinear Variable Order Fractional System
Source: Preprints.org preprint supplement (doi:10.20944/preprints202011.0199.v1), 2020-11-04

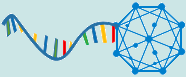

Supplement: Supplementary file 1 [file supplementary › GENAVOS beta version/genavos.png]
